# Supplementary figures and images for: Multi-Omics Analysis of Circulating Exosomes in Adherent Long-Term Treated OSA Patients
Source: MDPI journal article supplement (doi:10.3390/ijms242216074), 2023-11-08

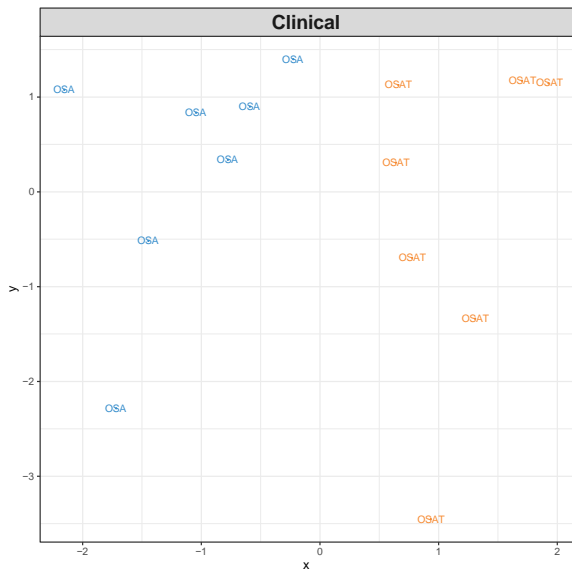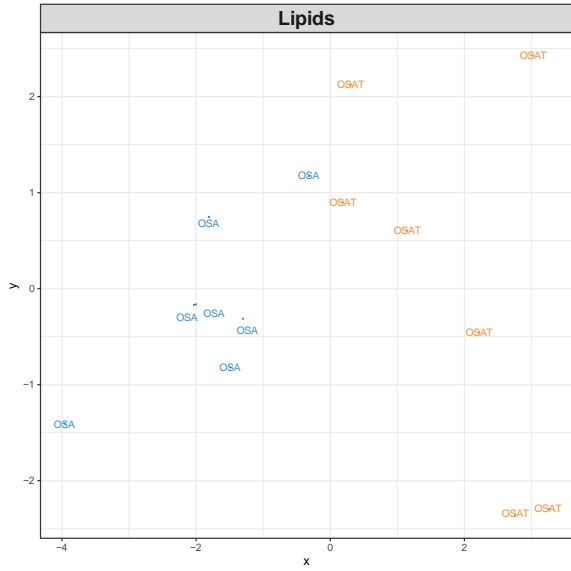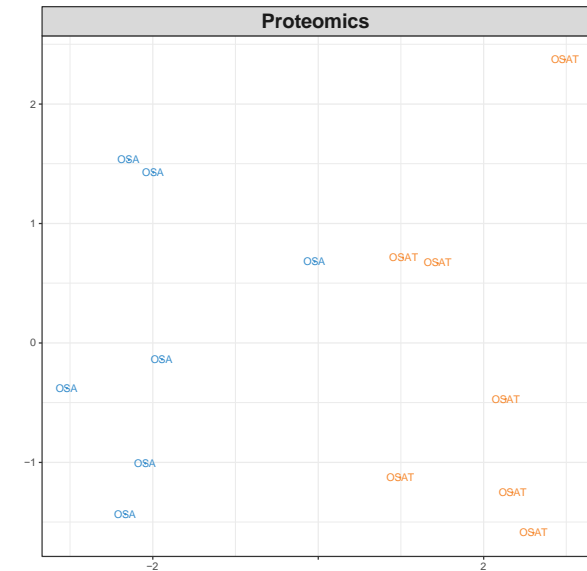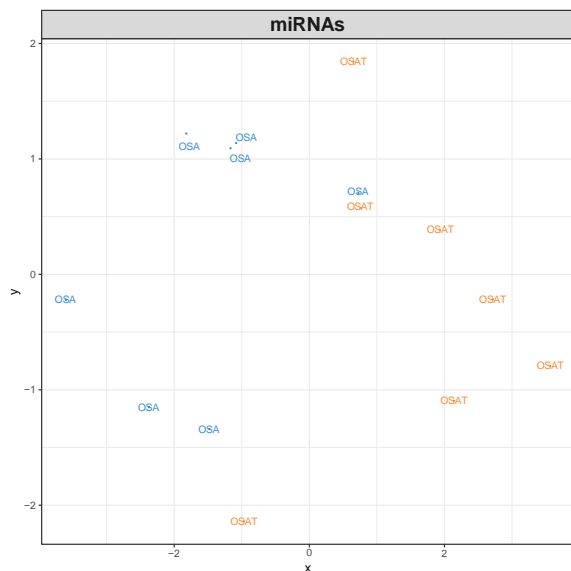

Supplement: s1 [file s1]
